# Supplementary material for: Quantifying the Role of Ground Beetles for the Dispersal of Fusarium and Alternaria Fungi in Agricultural Landscapes
Source: MDPI journal article supplement (doi:10.3390/jof7100863), 2021-10-14
Supplement: s1 [file s1]

# Quantifying the Role of Ground Beetles for the Dispersal of *Fusarium* and *Alternaria* Fungi in Agricultural Landscapes

Nadja Heitmann <sup>1,2,\*</sup>, Michael Glemnitz <sup>1</sup>, Peter Lentzsch <sup>1</sup>, Ralph Platen <sup>1</sup> and Marina E. H. Müller <sup>1,3</sup>

<sup>1</sup> Leibniz Centre for Agricultural Landscape Research (ZALF), Eberswalder Str. 84, 15374 Müncheberg, Germany; mglemnitz@zalf.de (M.G.); lentzsch@zalf.de (P.L.); ralph.platen@zalf.de (R.P.); mmueller@zalf.de (M.E.H.M.)

<sup>2</sup> Department of Ecology, Brandenburg University of Technology, Cottbus-Senftenberg, Platz der Deutschen Einheit 1, 03046 Cottbus, Germany

<sup>3</sup> Berlin-Brandenburg Institute of Advanced Biodiversity Research (BBIB), Altensteinstr. 34, 14195 Berlin, Germany

\* Correspondence: nadja.heitmann@zalf.de or nadja\_heitmann@hotmail.de

## Supplementary Materials

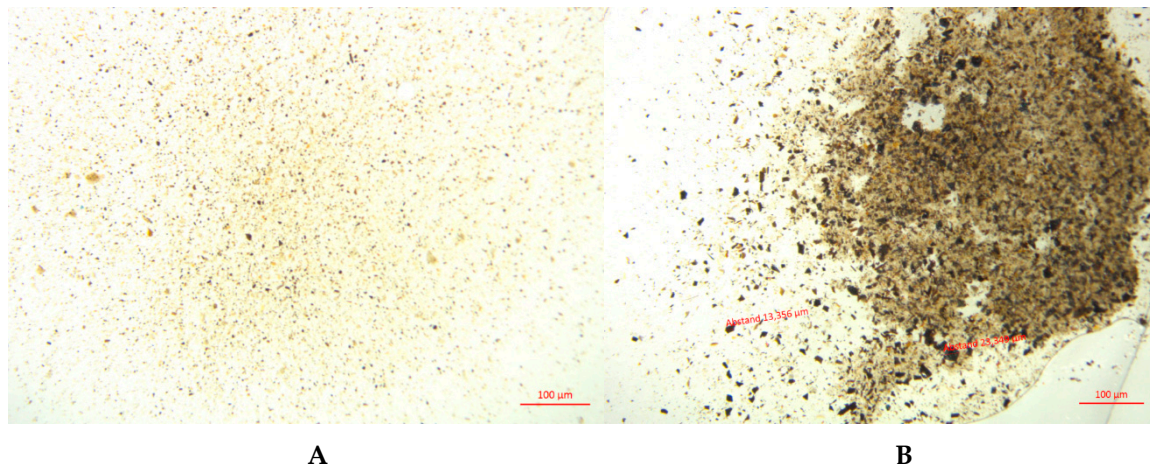

**Figure S1.** Photograph of a homogenized carabid beetle with a Zeiss ZEN 2 Blue Software (Zeiss, Oberkochen, Germany). Homogenization of was performed in 2.0 ml tubes with a high-speed benchtop homogenizer MP FastPrep 24 (MP Biomedicals Germany GmbH, Eschwege, Germany) at a speed setting of 6.5 m/sec and stainless steel grinding beads (MP Biomedicals Germany GmbH, Eschwege, Germany) of a (A) *Bembidion properans* for three cycles of 40 sec each and stored for 5 min at  $-80^{\circ}\text{C}$  between the cycles, with two 3.2 mm and one 5.5 mm beads. (B) *Poecilus versicolor* for two cycles of 40 sec each and stored for 5 min at  $-80^{\circ}\text{C}$  between the cycles, with two 3.2 mm beads. Based on this preliminary results, for *Harpalus affinis* and *Poecilus versicolor* a third cycle of 40 sec with an additionally 3.2 mm beat was applied for the qPCR method.
